# Supplementary material for: Large improvement of visible-light photocatalytic H2-evolution based on cocatalyst-free Zn0.5Cd0.5S synthesized through a two-step process
Source: Royal Society of Chemistry journal article supplement (doi:10.1039/c6cy02382g), 2017-01-01
Supplement: c6cy02382g1.pdf [file c6cy02382g1.pdf]

## Supporting information

### **High improvement of visible-light photocatalytic H<sub>2</sub>-evolution based on cocatalyst-free Zn<sub>0.5</sub>Cd<sub>0.5</sub>S synthesized by a two-step process**

Cong-Cong Shen, Ya-Nan Liu, Xiao Zhou, Hong-Li Guo, Zhi-Wei Zhao, Kuang Liang and An-Wu Xu,\*

Division of Nanomaterials and Chemistry, Hefei National Laboratory for Physical Sciences at

Microscale, Department of chemistry, University of Science and Technology of China, Hefei, 230026,

China

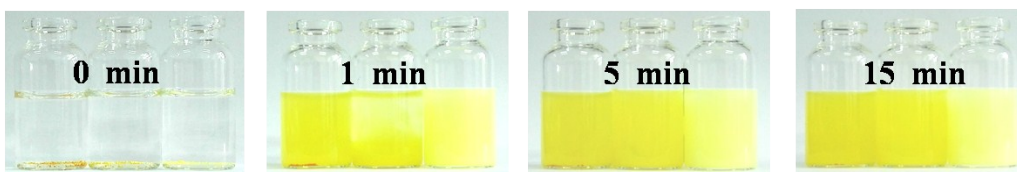

**Fig. S1** Pictures of dispersed ZnCdS-C, ZnCdS-H and ZnCdS-CH samples at 0 min, 1 min, 5 min and 15 min. In each picture, ZnCdS-C, ZnCdS-H and ZnCdS-CH samples are placed in left bottle, middle bottle and right bottle, respectively. The experiment conditions for all samples are the same.

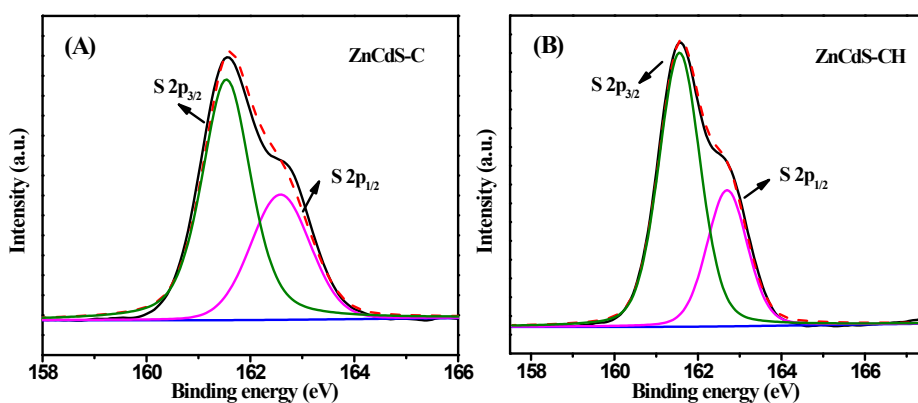

**Fig. S2** High-resolution XPS spectra of S 2p for ZnCdS-C (A) and ZnCdS-CH (B)

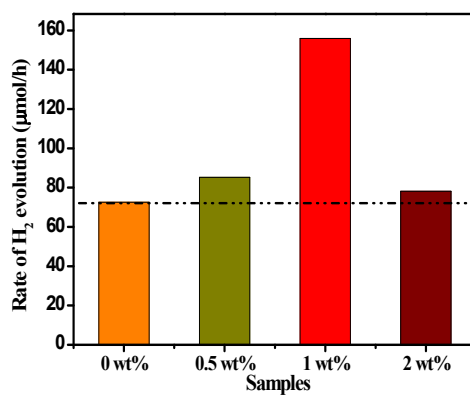

**Fig. S3** Comparison of photocatalytic H<sub>2</sub> production rates over ZnCdS-C sample with different Pt loading (wt %) under visible-light irradiation ( $\geq 420$  nm).

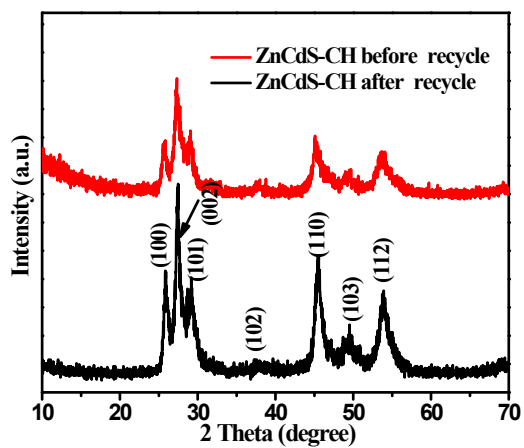

Fig. S4 Comparison of ZnCdS-CH samples before and after recycle.

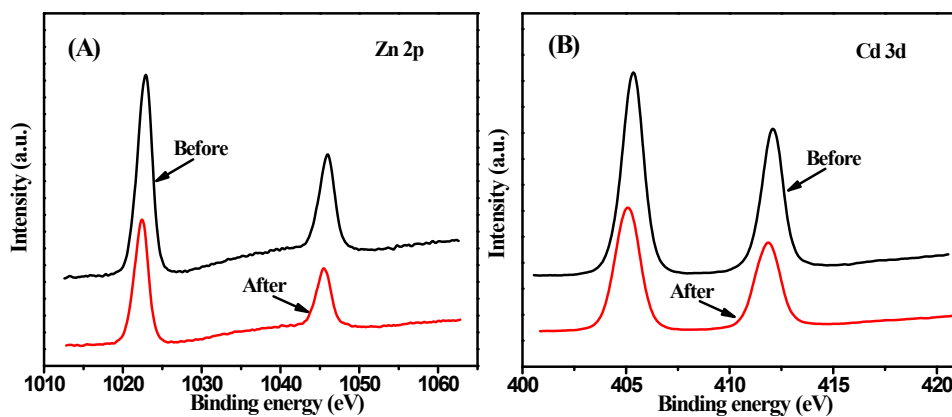

Fig. S5 High-resolution XPS spectra of Zn 2p and Cd 3d for ZnCdS-CH samples before and after recycle study.
